# Supplementary material
Source: PubMed Central journal article supplement (PMC3985973)
Supplement: supp_1.1.E27_2012-0031-1-at.pdf [file supp_1.1.E27_2012-0031-1-at.pdf]

## Appendix 1: Eligibility checklist

|                                                                       |                       |                                                           |
|-----------------------------------------------------------------------|-----------------------|-----------------------------------------------------------|
| Opioid for Dyspnea<br>Pre/Post Opioid Clinical Trial (G. Rocker)..... | ELIGIBILITY CHECKLIST | Study/ Log ID Number: _ _ -- _ _ _ _<br>Site # Sequence # |
|-----------------------------------------------------------------------|-----------------------|-----------------------------------------------------------|

**Please complete this form each time you assess a patient identified as potentially eligible/ suitable – (see Section C). For eligible patients who consent, assign a study number in sequence from the Eligible Patients Enrolled on Study log sheet. For ineligible patients or eligible patients who do not consent, assign a number in sequence from the Ineligible/ No Consent Patients log sheet (30 series).**

### Section A – Inclusion Criteria Patient’s Primary Diagnosis **must** be COPD:

|                                                                                                                                                                                                                                                                                                                                                                                                                      |                                                                                                                                                                                                     |                                         |
|----------------------------------------------------------------------------------------------------------------------------------------------------------------------------------------------------------------------------------------------------------------------------------------------------------------------------------------------------------------------------------------------------------------------|-----------------------------------------------------------------------------------------------------------------------------------------------------------------------------------------------------|-----------------------------------------|
| <input type="checkbox"/> <b>1. Age &gt; 55 and Chronic Obstructive Pulmonary Disease (COPD) – Severe or Moderate</b>                                                                                                                                                                                                                                                                                                 |                                                                                                                                                                                                     | Eligible                                |
| Severe – <i>one or more of:</i><br>➤ severe SOB resulting in the patient being too breathless to leave the house .....<br>➤ breathlessness after dressing/ undressing (MRC 5).....<br>➤ chronic respiratory failure (PaCO <sub>2</sub> > 45).....<br>➤ clinical signs of right heart failure.....                                                                                                                    | (√) one or more:<br>..... <input type="checkbox"/><br>..... <input type="checkbox"/><br>..... <input type="checkbox"/>                                                                              | (√)<br><br><br><input type="checkbox"/> |
| <i>OR</i>                                                                                                                                                                                                                                                                                                                                                                                                            |                                                                                                                                                                                                     |                                         |
| Moderate –<br>➤ SOB such that patient has to stop walking after 100 metres or a few minutes on ground level (MRC 3-4).....<br>AND -- <i>one or more of:</i><br>➤ acute exacerbation of COPD requiring hospital admission within the last year .....<br>➤ ICU admission.....<br>➤ forced expiratory volume in 1 sec ≤ 30% predicted.....<br>➤ BMI <21.....<br>AND --<br>➤ MRC 4 patients with baseline CRQ-D score >5 | (√)<br><input type="checkbox"/><br>AND one or more:<br>..... <input type="checkbox"/><br>..... <input type="checkbox"/><br>..... <input type="checkbox"/><br>AND:<br>..... <input type="checkbox"/> | (√)<br><br><br><input type="checkbox"/> |
| ➤ Primary reason for opioid prescription is for the treatment of dyspnea? .....                                                                                                                                                                                                                                                                                                                                      | (√)<br><input type="checkbox"/>                                                                                                                                                                     | (√)<br><input type="checkbox"/>         |

### Section B – Exclusion Criteria Circle Yes or No beside each of the criteria to determine if excluded. If eligible, continue completing checklist. If excluded, assign a 30-sequence ID number and skip to Section C if a family caregiver is available to approach.

|                                                                                                                                                                                                                                                                                   |                                                                                                                                          |                                         |
|-----------------------------------------------------------------------------------------------------------------------------------------------------------------------------------------------------------------------------------------------------------------------------------|------------------------------------------------------------------------------------------------------------------------------------------|-----------------------------------------|
|                                                                                                                                                                                                                                                                                   |                                                                                                                                          | Eligible                                |
| ➤ Acute exacerbation of COPD in the past month? .....<br>➤ patient is not able to communicate in English or French.....<br>➤ LOC is impaired due to medications, coma, encephalopathy, etc.....<br>➤ Patient has overlap syndrome (i.e. COPD and sleep disordered breathing)..... | YES (excluded) or NO (eligible)<br>YES (excluded) or NO (eligible)<br>YES (excluded) or NO (eligible)<br>YES (excluded) or NO (eligible) | (√)<br><br><br><input type="checkbox"/> |

### Section C – Suitability Assessment Check (√) to confirm study suitability has been confirmed.

|                                                                                                                                                                                                                                                                                                                                                                                 |                                                                                                                         |                                                                             |
|---------------------------------------------------------------------------------------------------------------------------------------------------------------------------------------------------------------------------------------------------------------------------------------------------------------------------------------------------------------------------------|-------------------------------------------------------------------------------------------------------------------------|-----------------------------------------------------------------------------|
|                                                                                                                                                                                                                                                                                                                                                                                 |                                                                                                                         | Eligible                                                                    |
| Patient has been <i>assessed and deemed suitable</i> by:<br>❖ attending physician .....<br>❖ bedside nurse.....<br>❖ case manager.....<br>❖ other (specify): .....<br>and <u>confirmed by research coordinator</u> to be a suitable candidate for the study.....<br><br>Cognitive abilities, physical stamina, psychological state indicate patient able to tolerate interview. | (√) one<br><input type="checkbox"/><br><input type="checkbox"/><br><input type="checkbox"/><br><input type="checkbox"/> | (√)<br><br><br><input type="checkbox"/><br><br><br><input type="checkbox"/> |

**Appendix 1: Eligibility checklist**

**Section D – Informed Consent** *If patient meets all above eligibility criteria, request study consent.*

|                                                                                                                         |                                       |                                             |
|-------------------------------------------------------------------------------------------------------------------------|---------------------------------------|---------------------------------------------|
| Informed consent has been obtained --> Yes -- Date signed: _____<br>No ( <i>explain</i> ): _____<br><br>Comments: _____ | (√)<br>..... <input type="checkbox"/> | Eligible<br>(√)<br><input type="checkbox"/> |
|                                                                                                                         |                                       |                                             |

**Section E – Identifying Information** Record below identifying information for eligible consenting patients.

|                                                                                                                                                                             |                                                                                                                                                                       |
|-----------------------------------------------------------------------------------------------------------------------------------------------------------------------------|-----------------------------------------------------------------------------------------------------------------------------------------------------------------------|
| Patient Initials: _____ -- _____ -- _____<br><span style="display: block; text-align: center; font-size: small;">First                  Middle                  Last</span> | Date of Birth: _____ -- _____ -- _____<br><span style="display: block; text-align: center; font-size: small;">Year                  Month                  Day</span> |
|-----------------------------------------------------------------------------------------------------------------------------------------------------------------------------|-----------------------------------------------------------------------------------------------------------------------------------------------------------------------|

Name of Research Coordinator: \_\_\_\_\_

Signature: \_\_\_\_\_ Date (*Year/ Month/ Day*): \_\_\_\_\_
