# Supplementary material
Source: PubMed Central journal article supplement (PMC3985973)

**Appendix 2: Flow of patients through the trial.** Immediate release morphine unless otherwise stated. SR = sustained release, M = Morphine, HM = hydromorphone

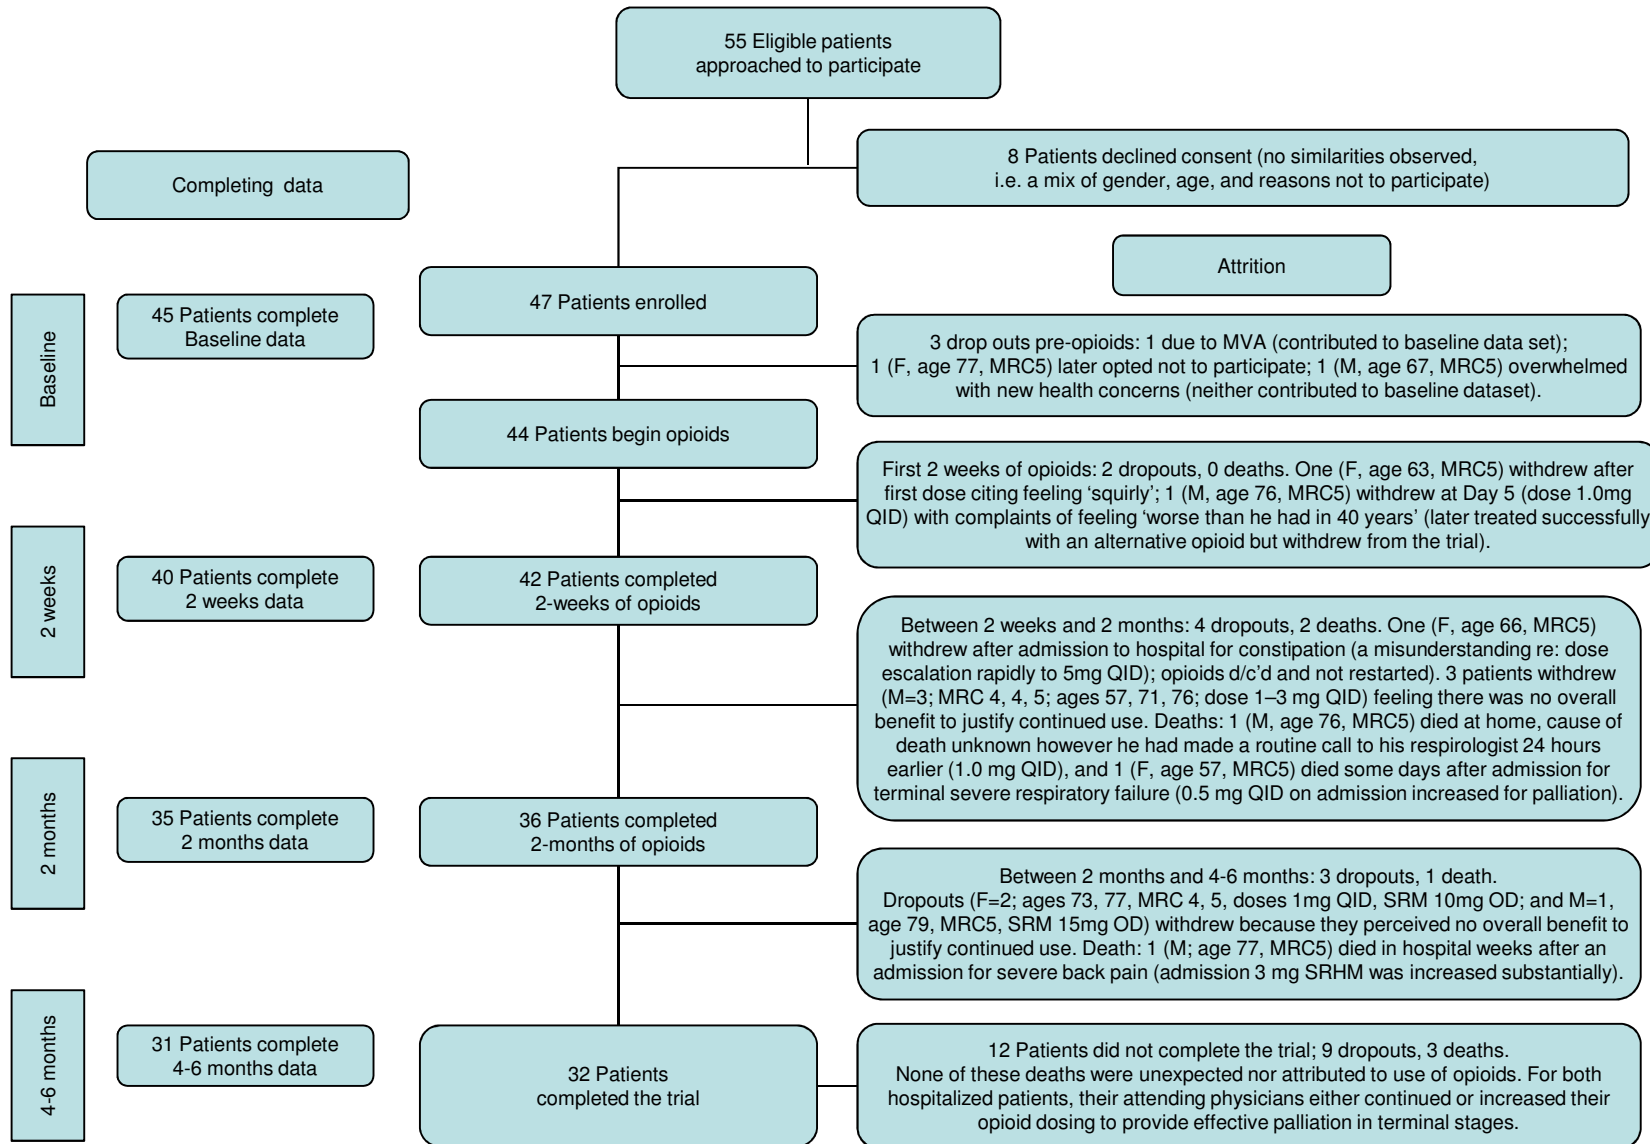

Supplement: supp_1.1.E27_2012-0031-2-at.pdf [file supp_1.1.E27_2012-0031-2-at.pdf]
