# Supplementary material
Source: PubMed Central journal article supplement (PMC3985973)
Supplement: supp_1.1.E27_2012-0031-4-at.pdf [file supp_1.1.E27_2012-0031-4-at.pdf]

**Appendix 4: Patient status and demographics form**

**Pt STATUS AND DEMOGRAPHICS Form**  
 Pre/Post Opioid Clinical Trial (G. Rocker).....

Study PID Number: \_\_\_\_ -- \_\_\_\_ -- \_\_\_\_  
 Site # Sequence#

|                                                                                      |
|--------------------------------------------------------------------------------------|
| Patient Initials: _____ -- _____ -- _____<br>First            Middle            Last |
| Date of Birth: _____ -- _____ -- _____<br>Year            Month            Day       |
| Gender (circle one):    F    or    M                                                 |

|                            |                              |            |
|----------------------------|------------------------------|------------|
| Marital status of Patient: |                              | (√)<br>one |
| 1                          | Married or living as married |            |
| 2                          | Widowed                      |            |
| 3                          | Never married                |            |
| 4                          | Divorced or separated        |            |
| 5                          | Other (specify):             |            |

|                                                                                |
|--------------------------------------------------------------------------------|
| Oxygen therapy: No _____ Yes _____ Flowrate _____ Saturation _____% FEV1 _____ |
|--------------------------------------------------------------------------------|

|                                      |                               |            |
|--------------------------------------|-------------------------------|------------|
| Ethnic/ Racial Group – self assessed |                               | (√)<br>one |
| 1                                    | Asian/ Pacific Islander       |            |
| 2                                    | African/ Black North American |            |
| 3                                    | Caucasian                     |            |
| 4                                    | East Indian                   |            |
| 5                                    | Native Canadian               |            |
| 6                                    | Other (specify);              |            |

|                                     |                                               |            |
|-------------------------------------|-----------------------------------------------|------------|
| Education -- highest level achieved |                                               | (√)<br>one |
| 1                                   | Elementary school or less                     |            |
| 2                                   | Some high school                              |            |
| 3                                   | High school graduate                          |            |
| 4                                   | Some college (including CEGEP)/ trade school  |            |
| 5                                   | College diploma (including DEC)/ trade school |            |
| 6                                   | Attended university                           |            |
| 7                                   | University degree                             |            |
| 8                                   | Post graduate degree                          |            |
| 9                                   | Other (specify):                              |            |

|                                  |                    |                                                                                                                                                  |                                                          |                    |  |
|----------------------------------|--------------------|--------------------------------------------------------------------------------------------------------------------------------------------------|----------------------------------------------------------|--------------------|--|
| Employment Status                |                    | Has your employment status changed as a result of your illness?<br><input type="checkbox"/> No or <input type="checkbox"/> Yes – complete below: |                                                          |                    |  |
| <u>Current</u> Employment Status |                    | (√)<br>one                                                                                                                                       | If YES: What was your <u>previous</u> employment status? |                    |  |
| 1                                | Employed full time |                                                                                                                                                  | 1                                                        | Employed full time |  |
| 2                                | Employed part time |                                                                                                                                                  | 2                                                        | Employed part time |  |
| 3                                | On paid leave      |                                                                                                                                                  | 3                                                        | On paid leave      |  |
| 4                                | On unpaid leave    |                                                                                                                                                  | 4                                                        | On unpaid leave    |  |
| 5                                | Self-employed      |                                                                                                                                                  | 5                                                        | Self-employed      |  |
| 6                                | Retired            |                                                                                                                                                  | 6                                                        | Retired            |  |
| 7                                | Not employed       |                                                                                                                                                  | 7                                                        | Not employed       |  |
| 8                                | Other (specify):   |                                                                                                                                                  | 8                                                        | Other (specify):   |  |

| 0  | None                                         | Comorbid Illnesses – circle all number codes that apply |                                                                   |    |                                                                             |
|----|----------------------------------------------|---------------------------------------------------------|-------------------------------------------------------------------|----|-----------------------------------------------------------------------------|
|    | Myocardial                                   |                                                         |                                                                   |    | Cancer/ Immune                                                              |
| 1  | Angina                                       |                                                         | Endocrine                                                         | 25 | Any tumour                                                                  |
| 2  | Arrhythmia                                   | 15                                                      | Diabetes Type 1 or II                                             | 26 | Lymphoma                                                                    |
| 3  | Valvular disease                             | 16                                                      | Diabetes with end organ damage                                    | 27 | Leukemia                                                                    |
| 4  | Myocardial infarction                        |                                                         |                                                                   | 28 | AIDS                                                                        |
| 5  | CHF or heart disease                         | 17                                                      | Obesity and/ or BMI >30 (weight in kg/ ht in metres) <sup>2</sup> | 29 | Metastatic solid tumour                                                     |
|    | Vascular                                     |                                                         |                                                                   |    | Psychological                                                               |
| 6  | Hypertension                                 |                                                         | Renal                                                             | 30 | Anxiety or panic disorder                                                   |
| 7  | Peripheral vascular disease or claudication  | 18                                                      | Moderate or severe renal disease                                  | 31 | Depression                                                                  |
| 8  | Cerebrovascular disease                      |                                                         | Gastrointestinal                                                  |    | Muskoskeletal                                                               |
|    | Pulmonary                                    | 19                                                      | Mild liver disease                                                | 32 | Arthritis (rheumatoid or osteo-)                                            |
| 9  | COPD, emphysema                              |                                                         |                                                                   | 33 | Denegerative disc disease (back, spinal stenosis, severe chronic back pain) |
| 10 | Asthma                                       | 20                                                      | Moderate/ severe liver disease                                    | 34 | Osteoporosis                                                                |
|    | Neurologic                                   |                                                         |                                                                   | 35 | Connective tissue disease                                                   |
| 11 | Dementia                                     | 21                                                      | GI bleeding                                                       |    | Miscellaneous                                                               |
| 12 | Hemiplegia (paraplegia)                      | 22                                                      | Inflammatory bowel disease                                        | 36 | Visual impairment (cataracts, glaucoma, macular degeneration)               |
| 13 | Stroke or TIA                                | 23                                                      | Peptic ulcer disease                                              | 37 | Hearing impairment (very hard of hearing even with hearing aid)             |
| 14 | Neurologic illnesses (e.g. MS or Parkinsons) | 24                                                      | GI disease (hernia, reflux)                                       |    |                                                                             |

| Palliative Performance Scale (PPS) – Please circle the applicable % level in the far left column |                   |                                                         |                                     |                   |                             |
|--------------------------------------------------------------------------------------------------|-------------------|---------------------------------------------------------|-------------------------------------|-------------------|-----------------------------|
| %                                                                                                | Ambulation        | Activity and Evidence of Disease                        | Self Care                           | Intake            | Consciousness Level         |
| 100                                                                                              | Full              | Normal Activity<br>No Evidence of Disease               | Full                                | Normal            | Full                        |
| 90                                                                                               | Full              | Normal Activity Some<br>Evidence of Disease             | Full                                | Normal            | Full                        |
| 80                                                                                               | Full              | Normal Activity with Effort<br>Some Evidence of Disease | Full                                | Normal or Reduced | Full                        |
| 70                                                                                               | Reduced           | Unable Normal Job/Work<br>Some Evidence of Disease      | Full                                | Normal or Reduced | Full                        |
| 60                                                                                               | Reduced           | Unable Hobby/House Work<br>Significant Disease          | Occasional Assistance<br>Necessary  | Normal or Reduced | Full or Confusion           |
| 50                                                                                               | Mainly Sit/Lie    | Unable to Do Any Work<br>Extensive Disease              | Considerable<br>Assistance Required | Normal or Reduced | Full or Confusion           |
| 40                                                                                               | Mainly in Bed     | As Above                                                | Mainly Assistance                   | Normal or Reduced | Full or Drowsy or Confusion |
| 30                                                                                               | Totally Bed Bound | As Above                                                | Total Care                          | Reduced           | Full or Drowsy or Confusion |
| 20                                                                                               | As above          | As Above                                                | Total Care                          | Minimal Sips      | Full or Drowsy or Confusion |
| 10                                                                                               | As above          | As Above                                                | Total Care                          | Mouth Care Only   | Drowsy or Coma              |
| 0                                                                                                | Death             | -                                                       | -                                   | -                 | -                           |

Please continue on next page ----->

**Questions about living arrangements:**

- a) Tell us about the community in which you live?  
 Mostly Rural    Mostly Urban    Mixed
- b) Does your home have more than one level, i.e., flights of stairs?  
 No    Yes - if yes, how many? \_\_\_\_\_
- c) Are you able to drive yourself to medical appointments?  
 Yes    No longer drive, rely on \_\_\_\_\_    No vehicle
- d) Do you have children?  
 No    Yes - number of children \_\_\_\_\_
- e) Would you say you are a follower of a particular religious tradition? e.g., Christianity, Judaism, Islam, etc.  
 No    Yes \_\_\_\_\_ If Christian, denomination \_\_\_\_\_
- f) How important are these beliefs to you at this point in your life?  
 Unimportant    Somewhat unimportant    neither important nor unimportant    Somewhat important    Important
- g) Do you have an advance directive (living will or power of attorney for health care decisions)?  
 No    Don't know    Yes: advance directive \_\_\_\_; power of attorney \_\_\_\_
- h) If you were given the choice, where would you prefer to die (for example: at home, in hospital, elsewhere)?  
 Don't know    at home    in hospital    elsewhere (please specify) \_\_\_\_\_

**For coordinator/interviewer:**

Qualitative interview completed: No \_\_\_\_\_ Yes \_\_\_\_\_ date: \_\_\_\_\_

Completed scales/questionnaires:

|          |                          |                                     |                          |
|----------|--------------------------|-------------------------------------|--------------------------|
| VAS..... | <input type="checkbox"/> | Global "helpfulness" questions..... | <input type="checkbox"/> |
| QoL..... | <input type="checkbox"/> | HADS.....                           | <input type="checkbox"/> |
| CRQ..... | <input type="checkbox"/> | NOSE.....                           | <input type="checkbox"/> |

*Sign and date this form*

Name of Site Research Coordinator/Interviewer: \_\_\_\_\_

Signature: \_\_\_\_\_ Date Completed: \_\_\_\_\_  
Year                      Month                      Day
