# Supplementary material
Source: PubMed Central journal article supplement (PMC3985973)
Supplement: supp_1.1.E27_2012-0031-6-at.pdf [file supp_1.1.E27_2012-0031-6-at.pdf]

## Appendix 6: Timelines

| Data collection                                 | Baseline | Titration | Opioid study period     |                           |
|-------------------------------------------------|----------|-----------|-------------------------|---------------------------|
|                                                 | week 0   | week 2    | 2 months<br>+/-<br>1 wk | 4–6 months<br>+/-<br>1 wk |
| Demographic information                         | x        |           |                         |                           |
| Qualitative interviews                          | x        |           | x                       | x                         |
| Dyspnea: CRQ-D, NRS, tolerability               | x        | x         | x                       | x                         |
| HRQoL:                                          |          |           |                         |                           |
| CRQ                                             | x        | x         | x                       | x                         |
| McGill Quality of Life Questionnaire (QOLLTI-P) | x        |           | x                       | x                         |
| HADS                                            | x        |           | x                       | x                         |
| Potential side effects (NOSE)                   | x        | x         | x                       | x                         |
| Overall opioid effect                           |          | x         | x                       | x                         |

Note: CRQ-D = Chronic Respiratory Questionnaire–Dyspnea domain; HRQoL = health-related quality of life; NRS = numerical rating scale; HADS = Hospital Anxiety and Depression Scale; NOSE = Numerical Opioid Side Effect assessment tool; QOLLTI-P = Quality of Life in Life-Threatening Illness – Patient version.
